# Supplementary material for: Comparative Transcriptome Analysis of Pueraria lobata Provides Candidate Genes Involved in Puerarin Biosynthesis and Its Regulation
Source: MDPI journal article supplement (doi:10.3390/biom13010170), 2023-01-13
Supplement: s1 [file s1]

*Supplementary Material*

**Comparative Transcriptome Analysis of *Pueraria lobata*  
Provides Candidate Genes Involved in Puerarin  
Biosynthesis and Its Regulation**

Huiting Xi <sup>1</sup>, Yaru Zhu <sup>1,2</sup>, Wenwen Sun <sup>1</sup>, Nan Tang <sup>1</sup>, Zhengqin Xu <sup>1</sup>, Xiaohong Shang <sup>3</sup>, Yansheng Zhang <sup>1</sup>,  
Huabing Yan <sup>3,\*</sup> and Changfu Li <sup>1,\*</sup>

<sup>1</sup> Shanghai Key Laboratory of Bio-Energy Crops, Research Center for Natural Products, Plant Science Center, School of Life Sciences, Shanghai University, Shanghai 200444, China

<sup>2</sup> Key Laboratory of Plant Germplasm Enhancement and Specialty Agriculture, Wuhan Botanical Garden, Chinese Academy of Sciences, Wuhan 430074, China

<sup>3</sup> Cash Crops Research Institute, Guangxi Academy of Agricultural Sciences, Nanning 530007, China

\* Correspondence: changfuli@shu.edu.cn (C.L.); h.b.yan@hotmail.com (H.Y.)

## Supplemental Tables

**Supplementary Table S1.** Summary of the RNA-sequencing data.

| Sample | Raw reads | Raw bases  | Clean reads | Clean bases | Error rate (%) | Q20 (%) | Q30 (%) | GC content (%) |
|--------|-----------|------------|-------------|-------------|----------------|---------|---------|----------------|
| YR2_1  | 51162820  | 7725585820 | 44856544    | 6621261977  | 0.0278         | 96.9    | 91.75   | 47.44          |
| YR2_2  | 53167924  | 8028356524 | 45647684    | 6755767590  | 0.0281         | 96.76   | 91.46   | 47.79          |
| YR2_3  | 53813846  | 8125890746 | 44872390    | 6612975199  | 0.0287         | 96.58   | 91.04   | 47.61          |
| YR4_1  | 44944130  | 6786563630 | 42900870    | 6387950619  | 0.028          | 96.79   | 91.5    | 46.43          |
| YR4_2  | 44628816  | 6738951216 | 42525438    | 6311530613  | 0.0287         | 96.56   | 90.92   | 46.57          |
| YR4_3  | 49413614  | 7461455714 | 46226424    | 6789406799  | 0.0278         | 96.92   | 91.71   | 46.53          |
| YR8_1  | 47704494  | 7203378594 | 40800462    | 6017310596  | 0.0281         | 96.78   | 91.52   | 47.12          |
| YR8_2  | 58092372  | 8771948172 | 45638182    | 6718943388  | 0.0283         | 96.66   | 91.34   | 48.26          |
| YR8_3  | 50491314  | 7624188414 | 44951144    | 6632882940  | 0.0279         | 96.83   | 91.71   | 48.86          |
| YS2_1  | 44305888  | 6690189088 | 42802992    | 6385801024  | 0.0281         | 96.82   | 91.43   | 46.35          |
| YS2_2  | 44737786  | 6755405686 | 43041360    | 6419808839  | 0.0275         | 97.03   | 91.96   | 47.25          |
| YS2_3  | 44808520  | 6766086520 | 43011638    | 6420113402  | 0.0276         | 96.98   | 91.87   | 46.64          |
| YS4_1  | 44809584  | 6766247184 | 43004166    | 6414884544  | 0.0283         | 96.72   | 91.25   | 46             |
| YS4_2  | 44581388  | 6731789588 | 42784410    | 6406097475  | 0.0279         | 96.87   | 91.59   | 45.93          |
| YS4_3  | 44961618  | 6789204318 | 43057166    | 6426743109  | 0.0281         | 96.8    | 91.45   | 46.21          |
| YS8_1  | 41972032  | 6337776832 | 40473576    | 6035407369  | 0.0278         | 96.91   | 91.63   | 46.12          |
| YS8_2  | 42444138  | 6409064838 | 40867750    | 6095473100  | 0.0282         | 96.76   | 91.31   | 47.03          |
| YS8_3  | 45061596  | 6804300996 | 43294590    | 6441813760  | 0.0279         | 96.86   | 91.6    | 46.62          |
| FR2_1  | 52058780  | 7860875780 | 43481058    | 6433916382  | 0.0277         | 96.96   | 91.83   | 47.59          |
| FR2_2  | 47865334  | 7227665434 | 43171002    | 6403156513  | 0.0278         | 96.89   | 91.72   | 46.71          |
| FR2_3  | 49266072  | 7439176872 | 45334738    | 6702661418  | 0.0287         | 96.55   | 90.99   | 46.69          |

|       |          |            |          |            |        |       |       |       |
|-------|----------|------------|----------|------------|--------|-------|-------|-------|
| FR4_1 | 44713950 | 6751806450 | 42900324 | 6390412104 | 0.0281 | 96.81 | 91.48 | 46.3  |
| FR4_2 | 44718466 | 6752488366 | 42990216 | 6410388734 | 0.0285 | 96.64 | 91.11 | 46.25 |
| FR4_3 | 44619468 | 6737539668 | 42742730 | 6369138655 | 0.0278 | 96.88 | 91.68 | 48.09 |
| FS2_1 | 44103664 | 6659653264 | 42665694 | 6367180846 | 0.0276 | 97    | 91.87 | 47.36 |
| FS2_2 | 42530190 | 6422058690 | 41093576 | 6153510720 | 0.028  | 96.84 | 91.43 | 47.85 |
| FS2_3 | 44468644 | 6714765244 | 42763658 | 6383896502 | 0.0278 | 96.91 | 91.67 | 47.38 |
| FS4_1 | 45082096 | 6807396496 | 43223912 | 6447150247 | 0.0279 | 96.86 | 91.57 | 47.06 |
| FS4_2 | 44709040 | 6751065040 | 43172778 | 6449782035 | 0.0271 | 97.2  | 92.31 | 47.72 |
| FS4_3 | 43062796 | 6502482196 | 41529684 | 6189382268 | 0.0276 | 97    | 91.88 | 47.71 |

Note: YR and YS represent the root and stem of *P.lobata* (wild); FR and FS represent the root and stem of *P.lobata* var. thomsonii; The number next to the sample name refers to the stage at which the sample was harvested; for example, YR2 represents the 2 month-old root of *P.lobata* (wild); Three biological replicates were performed for each stage.

**Supplementary Table S2.** Summary statistics of the mapping of RNA-sequencing reads derived from each sample of this study to the genome of *P.lobata* var.thomsonii.

| Sample | Total reads | Total mapped     | Multiple mapped | Uniquely mapped  |
|--------|-------------|------------------|-----------------|------------------|
| YR2_1  | 44856544    | 40620614(90.56%) | 8051499(17.95%) | 32569115(72.61%) |
| YR2_2  | 45647684    | 40983890(89.78%) | 8115435(17.78%) | 32868455(72.0%)  |
| YR2_3  | 44872390    | 40885316(91.11%) | 8147883(18.16%) | 32737433(72.96%) |
| YR4_1  | 42900870    | 39660543(92.45%) | 8530594(19.88%) | 31129949(72.56%) |
| YR4_2  | 42525438    | 38754116(91.13%) | 8030927(18.88%) | 30723189(72.25%) |
| YR4_3  | 46226424    | 42245999(91.39%) | 8700034(18.82%) | 33545965(72.57%) |
| YR8_1  | 40800462    | 36588924(89.68%) | 6862925(16.82%) | 29725999(72.86%) |
| YR8_2  | 45638182    | 40935009(89.69%) | 7697446(16.87%) | 33237563(72.83%) |
| YR8_3  | 44951144    | 37333448(83.05%) | 7038350(15.66%) | 30295098(67.4%)  |
| YS2_1  | 42802992    | 40422203(94.44%) | 9061214(21.17%) | 31360989(73.27%) |
| YS2_2  | 43041360    | 40736914(94.65%) | 12180374(28.3%) | 28556540(66.35%) |

|       |          |                  |                  |                  |
|-------|----------|------------------|------------------|------------------|
| YS2_3 | 43011638 | 40576729(94.34%) | 10090537(23.46%) | 30486192(70.88%) |
| YS4_1 | 43004166 | 40189599(93.46%) | 7735296(17.99%)  | 32454303(75.47%) |
| YS4_2 | 42784410 | 40335702(94.28%) | 8214082(19.2%)   | 32121620(75.08%) |
| YS4_3 | 43057166 | 40318256(93.64%) | 8496949(19.73%)  | 31821307(73.9%)  |
| YS8_1 | 40473576 | 38098492(94.13%) | 8963433(22.15%)  | 29135059(71.99%) |
| YS8_2 | 40867750 | 38398361(93.96%) | 10461225(25.6%)  | 27937136(68.36%) |
| YS8_3 | 43294590 | 40690288(93.98%) | 9108043(21.04%)  | 31582245(72.95%) |
| FR2_1 | 43481058 | 37817487(86.97%) | 7020851(16.15%)  | 30796636(70.83%) |
| FR2_2 | 43171002 | 40137879(92.97%) | 7293566(16.89%)  | 32844313(76.08%) |
| FR2_3 | 45334738 | 41834367(92.28%) | 7630910(16.83%)  | 34203457(75.45%) |
| FR4_1 | 42900324 | 40112987(93.5%)  | 8346692(19.46%)  | 31766295(74.05%) |
| FR4_2 | 42990216 | 39820627(92.63%) | 7826272(18.2%)   | 31994355(74.42%) |
| FR4_3 | 42742730 | 39690545(92.86%) | 7846304(18.36%)  | 31844241(74.5%)  |
| FS2_1 | 42665694 | 40488706(94.9%)  | 11160843(26.16%) | 29327863(68.74%) |
| FS2_2 | 41093576 | 38736581(94.26%) | 12140995(29.54%) | 26595586(64.72%) |
| FS2_3 | 42763658 | 40488533(94.68%) | 11869774(27.76%) | 28618759(66.92%) |
| FS4_1 | 43223912 | 40815386(94.43%) | 11107901(25.7%)  | 29707485(68.73%) |
| FS4_2 | 43172778 | 40820604(94.55%) | 13147681(30.45%) | 27672923(64.1%)  |
| FS4_3 | 41529684 | 39220312(94.44%) | 12747353(30.69%) | 26472959(63.74%) |

---

Note: Multiple mapped reads mean that the reads were mapped to multiple locations of the genome, and uniquely mapped reads represent the reads specifically mapped to a single location of the genome; the mapped percentage is shown in brackets.

**Supplementary Table S3.** Summary statistics of functional annotations for unigenes and transcripts from *P.lobata* via public databases.

|            | Expre_Gene number (percent) | Expre_Transcript number (percent) | All_Gene number (percent) | All_Transcript number (percent) |
|------------|-----------------------------|-----------------------------------|---------------------------|---------------------------------|
| GO         | 44931(0.8776)               | 44293(0.8773)                     | 48360(0.8779)             | 48360(0.8779)                   |
| KEGG       | 21669(0.4232)               | 21331(0.4225)                     | 23007(0.4176)             | 23007(0.4176)                   |
| COG        | 49182(0.9606)               | 48510(0.9609)                     | 52499(0.953)              | 52499(0.953)                    |
| NR         | 50999(0.9961)               | 50285(0.996)                      | 54881(0.9962)             | 54881(0.9962)                   |
| Swiss-Prot | 44189(0.8631)               | 43566(0.8629)                     | 47376(0.86)               | 47376(0.86)                     |
| Pfam       | 40246(0.7861)               | 39627(0.7849)                     | 43392(0.7877)             | 43392(0.7877)                   |
| Total_anno | 51006(0.9962)               | 50292(0.9962)                     | 54888(0.9964)             | 54888(0.9964)                   |
| Total      | 51199(1.0)                  | 50485(1.0)                        | 55088(1)                  | 55088(1)                        |

Note: Expre\_Gene number represents the number of genes whose fpkm value is above 0 in at least one sample sequenced; Expre\_Transcript number represents the number of transcripts whose fpkm value is above 0 in at least one sample; All\_Gene number means the number of genes in total; All\_Transcript number means the number of transcripts in total; The percentage of genes or transcripts having successfully been annotated via each public database is given in brackets.

**Supplementary Table S4.** Transcript abundances of upstream genes for the biosynthesis of isoflavones in each *P.lobata* sample.

|         | YR2      | YR4      | YR8      | YS2      | YS4      | YS8      | FR2      | FR4      | FS2      | FS4      |
|---------|----------|----------|----------|----------|----------|----------|----------|----------|----------|----------|
| PIPAL-1 | 16.89667 | 111.5    | 15.85    | 15.62667 | 57.49333 | 16.26    | 20.10333 | 74.72    | 13.26667 | 18.26333 |
| PIPAL-2 | 5.04     | 74.36667 | 32.45333 | 14.34    | 124.2133 | 29.48333 | 9.026667 | 38.57333 | 9.286667 | 16.62    |
| PIC4H-1 | 4.126667 | 11.57333 | 20.49    | 0.626667 | 2.48     | 0.14     | 0.3      | 2.85     | 0.44     | 0.9      |
| PIC4H-2 | 0        | 2.73     | 4.003333 | 0        | 0.393333 | 0.016667 | 0        | 0.346667 | 0        | 0.043333 |
| PI4CL-1 | 0        | 0        | 0        | 0.5      | 0.126667 | 0.006667 | 0        | 0.026667 | 0.446667 | 0.24     |
| PI4CL-2 | 0.086667 | 0.103333 | 0.006667 | 0        | 0        | 0.13     | 0        | 0.04     | 0        | 0        |
| PI4CL-3 | 0.25     | 0        | 0        | 0.03     | 0.513333 | 0.306667 | 0.006667 | 0        | 0.026667 | 0.123333 |
| PICHS-1 | 15.97    | 104.27   | 44.48    | 5.14     | 16.03667 | 8.336667 | 31.52    | 34.83667 | 5.346667 | 3.473333 |

|         |          |          |          |          |          |          |          |          |          |          |
|---------|----------|----------|----------|----------|----------|----------|----------|----------|----------|----------|
| PICHS-2 | 1.993333 | 14.67667 | 10.22    | 2.15     | 2.783333 | 3.696667 | 0.97     | 14.51667 | 0.196667 | 1.29     |
| PICHS-3 | 8.976667 | 149.8867 | 51.44    | 5.596667 | 19.47    | 14.11333 | 32.37    | 39.29333 | 4.846667 | 4.976667 |
| PICHI-1 | 1825.443 | 434.0967 | 3037.16  | 115.6167 | 177.6167 | 215.38   | 1138.3   | 623.1267 | 77.13667 | 129.9767 |
| PICHI-2 | 192.9    | 210.09   | 175.96   | 68.07    | 47.83333 | 78.12    | 188.8067 | 231.67   | 35.31333 | 31.39667 |
| PICHR-1 | 357.0067 | 374.74   | 261.69   | 42.52    | 38.08    | 96.11667 | 192.5433 | 396.85   | 20.15333 | 22.57333 |
| PICHR-2 | 46.90667 | 36.51667 | 10.71    | 20.36    | 5.383333 | 86.87    | 60.78333 | 35.27333 | 9        | 9.153333 |
| PICHR-3 | 4.413333 | 4.21     | 0.953333 | 1.71     | 1.42     | 6.923333 | 6.823333 | 7.713333 | 0.366667 | 5.523333 |
| PIIFS   | 183.39   | 352.2233 | 1049.823 | 8.973333 | 47.92    | 180.67   | 487.7967 | 343.2867 | 21.39    | 29.85    |

Note: The transcript abundance is represented by the FPKM values retrieved from the RNA-sequencing data, and each value is the average of three biological replicates.

**Supplementary Table S5.** Accession number of the previously characterized C- and O-UGTs selected for the phylogenetic analysis of this study.

| Name    | GenBank accession number | Biochemical property              | Host plant species          |
|---------|--------------------------|-----------------------------------|-----------------------------|
| MiCGT   | A0A0M4KE44               | Flavanone C- glucosyltransferase  | <i>Mangifera indica</i>     |
| CuCGT1  | A0A224AKZ9               | Flavanone C- glucosyltransferase  | <i>Citrus unshiu</i>        |
| TcCGT1  | QCZ42162                 | Flavone C- glucosyltransferase    | <i>Trollius chinensis</i>   |
| DcUGT2  | A0A291PQH4               | Carminate C- glucosyltransferase  | <i>Dactylopius coccus</i>   |
| WjGT1   | BBI55602                 | Flavone C- glucosyltransferase    | <i>Eutrema japonicum</i>    |
| OsCGT   | Q5VMI0                   | Flavanone C- glucosyltransferase  | <i>Oryza sativa</i>         |
| UGT78D1 | NP_564357                | Flavonol 3-O- glucosyltransferase | <i>Arabidopsis thaliana</i> |
| UGT78D2 | NP_197207                | Flavonol 3-O- glucosyltransferase | <i>Arabidopsis thaliana</i> |
| UGT78D3 | NP_197205                | Flavonol 3-O-glucosyltransferase  | <i>Arabidopsis thaliana</i> |
| UGT89C1 | Q9LNE6                   | Flavonol 7-O-rhamnosyltransferase | <i>Arabidopsis thaliana</i> |
| UGT73C6 | NP_181217                | Flavone 7-O-glycosyltransferase   | <i>Arabidopsis thaliana</i> |

|            |              |                                                                        |                                |
|------------|--------------|------------------------------------------------------------------------|--------------------------------|
| UGT75C1    | NP_001348274 | Flavone 5- <i>O</i> -glycosyltransferase                               | <i>Solanum lycopersicum</i>    |
| UGT78A2    | BAD06514     | Anthocyanin 3- <i>O</i> -galactosyltransferase                         | <i>Aralia cordata</i>          |
| UGT94B1    | Q5NTH0       | Cyanidin-3- <i>O</i> -glucoside 2- <i>O</i> -glucuronosyltransferase   | <i>Bellis perennis</i>         |
| CRUGT3     | KAI5656423   | Flavone 7- <i>O</i> -glycosyltransferase                               | <i>Catharanthus roseus</i>     |
| FEUGT708C1 | BAP90360     | Flavanone C- glucosyltransferase                                       | <i>Fagopyrum esculentum</i>    |
| FAGT7      | Q2V6J9       | Flavone 3- <i>O</i> -glucosyltransferase                               | <i>Fragaria x ananassa</i>     |
| GtUF6CGT1  | A0A0B6VIJ5   | Flavone C-glucosyltransferase                                          | <i>Gentiana triflora</i>       |
| UGT708D1   | NP_001347241 | Flavanone C-glucosyltransferase                                        | <i>Glycine max</i>             |
| GMUGT1     | NP_001279020 | Isoflavone 7- <i>O</i> -glucosyltransferase                            | <i>Glycine max</i>             |
| UGT79G16   | Q53UH5       | Anthocyanidin 3- <i>O</i> -glucoside 2"- <i>O</i> -glucosyltransferase | <i>Ipomoea purpurea</i>        |
| UGT73C8    | XP_003625716 | Flavone 7- <i>O</i> -glycosyltransferase                               | <i>Medicago truncatula</i>     |
| UGT78G1    | A6XNC6       | Flavonoid 3- <i>O</i> -glucosyltransferase                             | <i>Medicago truncatula</i>     |
| NT7GLCT    | Q9AT54       | Flavone 7- <i>O</i> -glycosyltransferase                               | <i>Nicotiana tabacum</i>       |
| PHF3GLCT   | Q9SBQ8       | Flavonol 3- <i>O</i> -glucosyltransferase                              | <i>Petunia x hybrida</i>       |
| PH1-6RHAT  | CAA50376     | Anthocyanin 3 glucoside: rhamnosyltransferase                          | <i>Petunia x hybrida</i>       |
| PF5GLCT    | NP_193146    | Flavone 5- <i>O</i> -glucosyltransferase                               | <i>Arabidopsis thaliana</i>    |
| PHA5GT     | BAA89009     | Anthocyanin 5- <i>O</i> -glucosyltransferase                           | <i>Petunia x hybrida</i>       |
| GT04F14    | ADV71364     | Isoflavone 7- <i>O</i> -glucosyltransferase                            | <i>Pueraria lobata</i>         |
| GT14A05    | ADV71369     | Flavone 7- <i>O</i> -glucosyltransferase                               | <i>Pueraria lobata</i>         |
| GT03H24    | ADV71363     | N/A                                                                    | <i>Pueraria lobata</i>         |
| SBUF7GT    | BAA83484     | Flavonoid 7- <i>O</i> -glucosyltransferase                             | <i>Scutellaria baicalensis</i> |
| URDGT2     | AAF00209     | Antibiotic urdamycin C-glucosyltransferase                             | <i>Streptomyces fradiae</i>    |
| TH5GT      | BAC54093     | Anthocyanidin 5- <i>O</i> -glucosyltransferase                         | <i>Torenia hybrid cultivar</i> |
| VVGT6      | NP_001267832 | Anthocyanidin 3- <i>O</i> -glucosyltransferase                         | <i>Vitis vinifera</i>          |

|         |              |                                                                       |                              |
|---------|--------------|-----------------------------------------------------------------------|------------------------------|
| VH5GLCT | Q9ZR25       | Anthocyanidin 3- <i>O</i> -glucoside 5- <i>O</i> -glucosyltransferase | <i>Glandularia x hybrida</i> |
| VVGT1   | NP_001384786 | Anthocyanidin 3- <i>O</i> -glucosyltransferase                        | <i>Vitis vinifera</i>        |
| VVGT5   | BAI22846     | Anthocyanidin 5- <i>O</i> -glucosyltransferase                        | <i>Vitis vinifera</i>        |
| ZMCGT   | NP_001132650 | Flavanone C-glucosyltransferase                                       | <i>Zea mays</i>              |
| ZM3GLCT | P16165       | Anthocyanidin 3- <i>O</i> -glucosyltransferase                        | <i>Zea mays</i>              |
| PIUGT43 | A0A172J2G3   | Isoflavone C-glucosyltransferase                                      | <i>Pueraria lobata</i>       |

**Supplementary Table S6.** The predicted amino acid sequences of the three PIUGT candidates of this study.

| PIUGT candidates | Predicted amino acid sequences                                                                                                                                                                                                                                                                                                                                                                                                                                                                             |
|------------------|------------------------------------------------------------------------------------------------------------------------------------------------------------------------------------------------------------------------------------------------------------------------------------------------------------------------------------------------------------------------------------------------------------------------------------------------------------------------------------------------------------|
| PIUGT82          | mgkthtiavipsagfshfapilqfskrlvelhpdhvtcivpiigslpssskailqtlppninpvflppvnlddpqgvpvqvqqlamsham<br>psihhtlksitsstphaamvdsfascaldfahelnmlsyvyfpcattlsthfylpklddeetsceyrdldpdpievpgcvpfhgrdlysqaqdrs<br>sqlykvsllkrykrysvdgiimnsflaletgpiralkdeergyphvypigpivqtgdsakglewltwldkqqvgslylvsgsggtlsqeq<br>mnelayglelnhkfllwvrapnadnsaylgeqivdplqlfsgflertkeqgvvipswapqvqlshssvvggflthcgwnstletvllhgv<br>pvitwplyaeqrnnavllceglkvgvprvpsenglvekeciaevikclmegeegakmrkrmkleceaatnalkegssstetlselalmwk<br>gla             |
| PIUGT83          | mvqqrqnnvhvivlpypaqghinplvqfakrlaskgvkatvatthyansiaapnitveaisdgfdeagfaqtnnnvqlfltsfrtngsrtsql<br>iqkhqqtspvtcivdydsffpwaldvakqhggiygaafftnsaavcnifcrihghgielpvkmedlplrvpglplpdsralpsfvkfpqspay<br>mamklsqfslnleadwmfvntfealegevvgkltfeffpkmigmvmvpsgyldgrikgdkgysalwkppteecsnwleakapqsvvy<br>isfgsmvsltaeqmeevawglkesgvsflwviresehglpksgyrdlvdkdglivtwcnqllelahqatqcfvthcgwnstletvllhgv<br>clpqwadqlpdakfldeiwegvvpkedekgiirkqcfvkslkvvmegersqeirrnankwkklareavgegssdkhinqfvdhlm<br>nadkngslnv             |
| PIUGT86          | meqqdtntivlypapgighivsmvelakllqthhsitillttgfdhpsidayihristshpsisfhlrlphalaatpttvsraakafdkrntpn<br>vsttltrisksttikafvidlftcsamesassligipvyfftsgaavlaflsyfplheetsmsfkdmvgvelrvpgnaplrvnmpepvlrdd<br>paywdmlyfcthlpkargiivnsfpelepavakaiaadgacfpnpehappvyymgpliaepqppqpdvatdskqlcswldaqaasrvvfl<br>cfsglsfvpvslqreianglersghrflwvkrpiqdegtklihdtttgefdlssvlpsgfiertkdrigvrvrtwapqvevlrsdsvgafvshcg<br>wnsvlegvvagvpmvawplyaeqhvnrhvmvmgemkvavaveqreedgfvsgveevkrvrevmeskevretsfklqlalaaavgsg<br>sstalanlvhswv |

**Supplementary Table S7.** The predicted amino acid sequences of the three PIMYB candidates of this study.

| PIMYB candidates | Predicted amino acid sequences                                                                                                                                                                                                                                                                      |
|------------------|-----------------------------------------------------------------------------------------------------------------------------------------------------------------------------------------------------------------------------------------------------------------------------------------------------|
| PIMYB61          | msracaaadsaasgeimlfgvrvvdsmrksvsmnnlsqychpqdanannnnkdsllaagyasaddaaphnsgrhrerkrvgvpwtee<br>ehklflvqlkvkgdwrisknyvkrtrptqvashaqkyflrrsnlnrrrrsslfdditdtvsaipeeceqvqnqdtllshsqpvcapvpetsk<br>isgfpmmppvyqfvgvgvisvqggnpmeeltlgqgnvekhvnpnkastvdsdiapssssavdpptlslglsfssdqrqtssrhshaiqcf<br>sngdsiisva |
| PIMYB83          | mgllkkgpwapeedqiitsyiekhghgnwralpkagallrcgksclrwinylrpdikrgnfticeetiiklhmlgnrwsaiaaklpgrtd<br>neiknvwhnllkrlksdqpnskratkprikrdsnsiitqsepanlnfremdttsactssdsfssvtvgdsknikcediesletmpvide<br>sfwseaaidetptmssqsltisnemplqyfpfanyeesfqshaydsnfddgmdfwtrlygltdaqdswdtagtqlkmagygsdta                    |



---

PIMYB122

mvsvnpnpaqqfyffdpnmalpgvnnlpppttpaapaaapavvedpskkirkpytitksreswteqehdkflealqlfdrdwkkieaf  
vgsktviqirshaqkyflkvqkngtsehvprrprkrkasrpyypqkapktptvsqvmgplqssafiepayiyspdsssvlgtptvtnmplss  
wnynttpqpvnvpqvtrddmgltagqavpncycyssnestpptcpsskrinqgdqgkvikvmpdfaqqvysfigsvfdpnstnhlqklr  
qmdpinvetvllmrnlslinmspefedhkrllssydtddskskfvnicsskltkaesavl

---
